# Supplementary material for: Proteomic and microbiota analyses of the oral cavity during psychological stress
Source: PubMed Central journal article supplement (PMC9132284; doi:10.1371/journal.pone.0268155), 2022-05-25
Supplement: pone.0268155.s004.pdf [file pone.0268155.s004.pdf]

# Gel images after fluorescent staining used for quantification

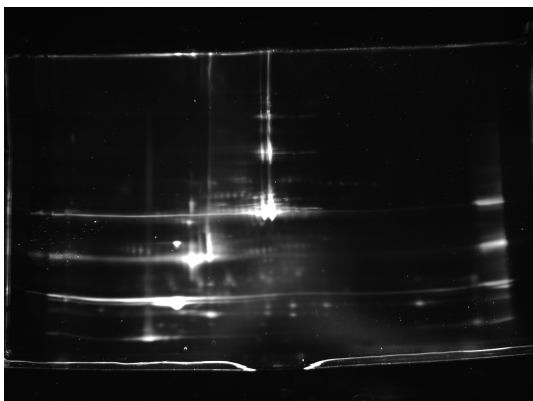

Control 1

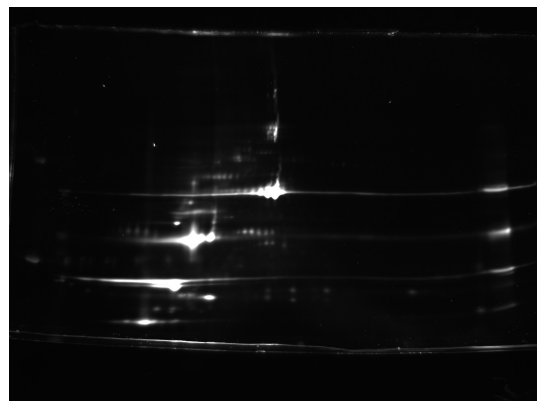

Control 5

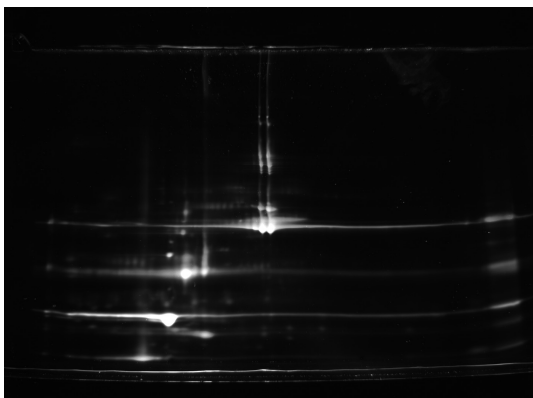

Control 2

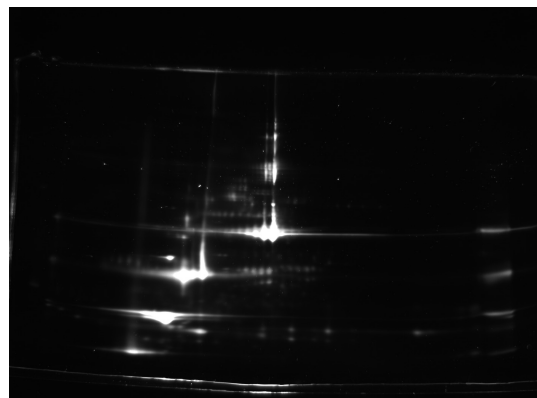

Control 6

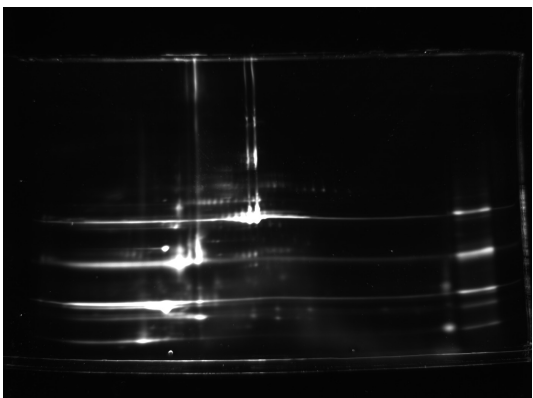

Control 3

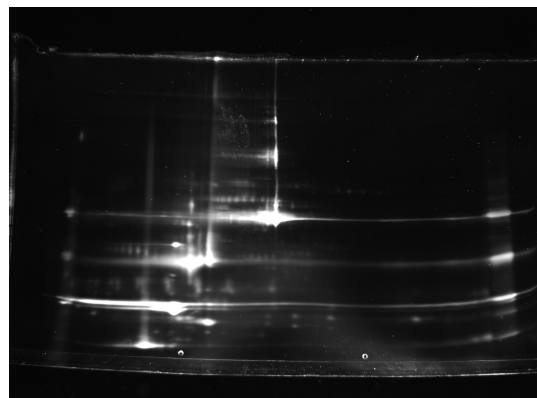

Control 7

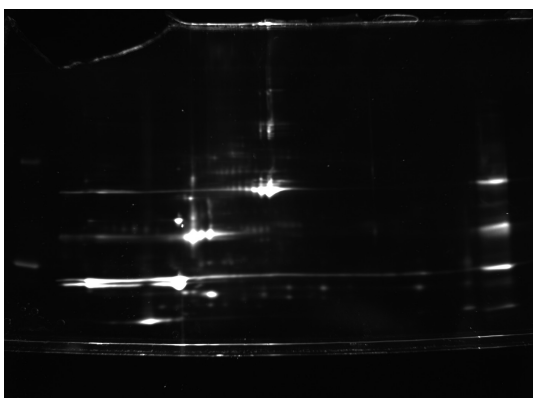

Control 4

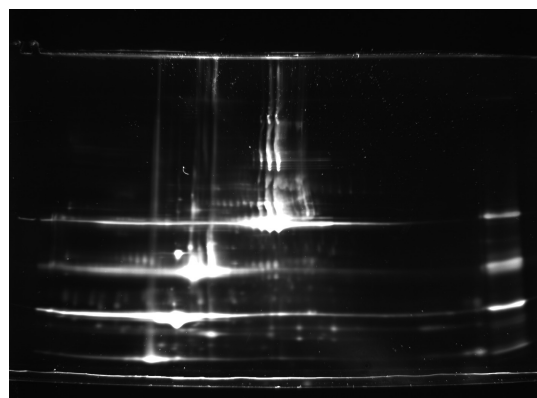

Control 8

# Gel images after fluorescent staining used for quantification

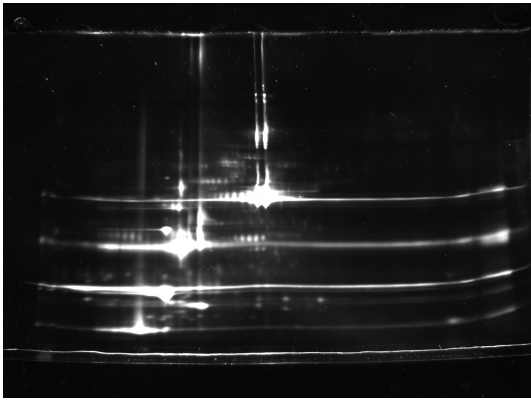

Stress 1

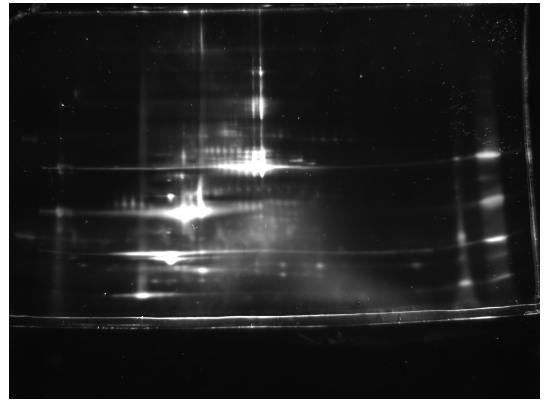

Stress 5

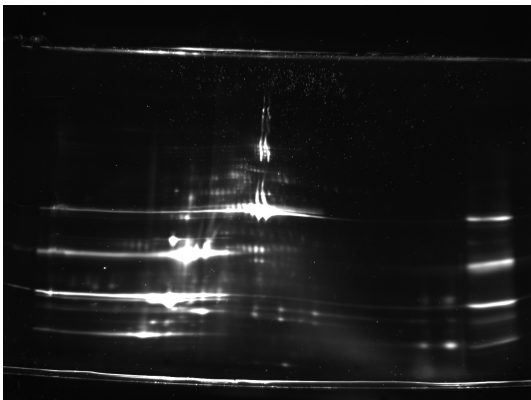

Stress 2

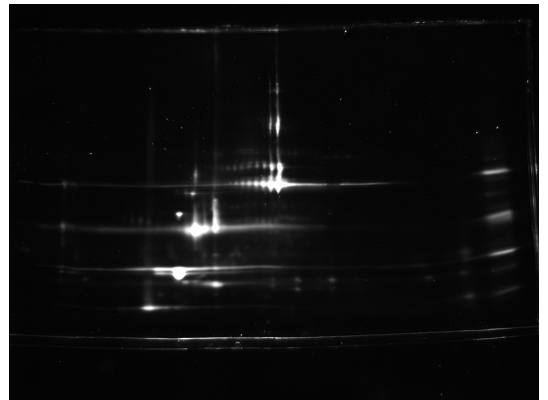

Stress 6

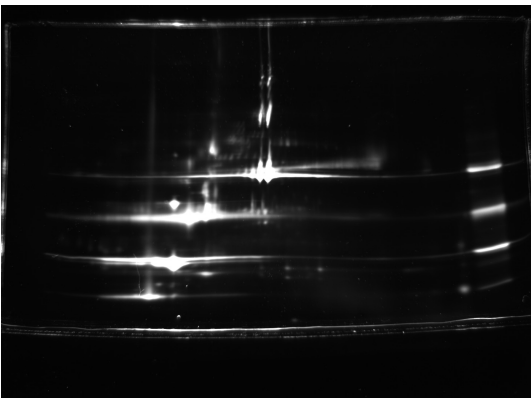

Stress 3

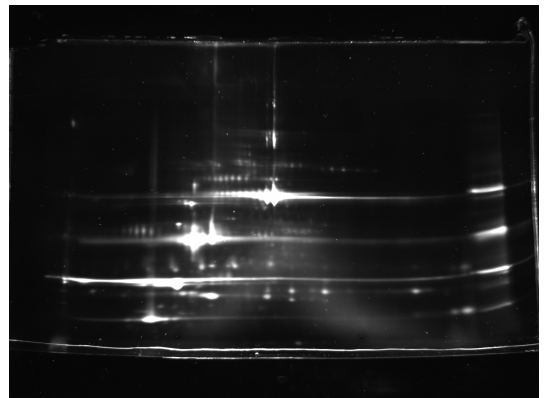

Stress 7

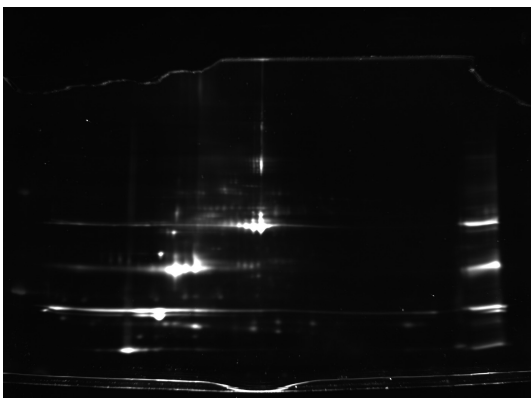

Stress 4

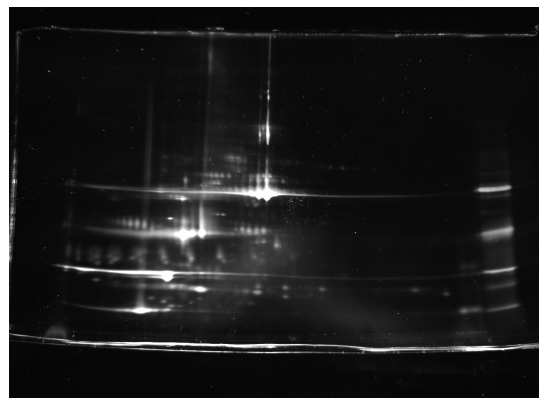

Stress 8
