# Supplementary material for: Proteomic and microbiota analyses of the oral cavity during psychological stress
Source: PubMed Central journal article supplement (PMC9132284; doi:10.1371/journal.pone.0268155), 2022-05-25
Supplement: pone.0268155.s005.pdf [file pone.0268155.s005.pdf]

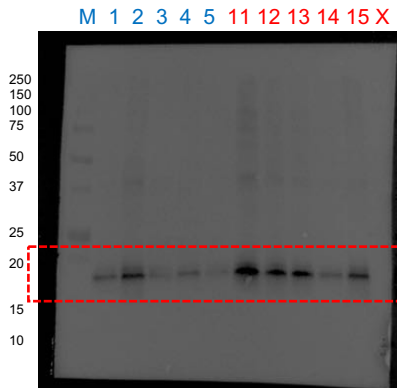

Blot 1

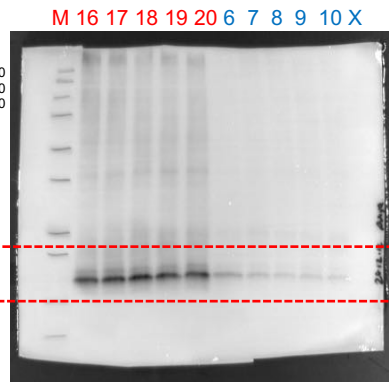

Blot 2

← VEGP

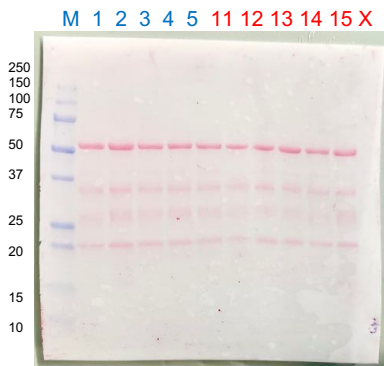

Blot 1 (Ponceau S Staining)

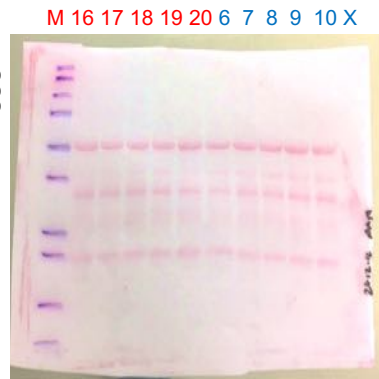

Blot 2 (Ponceau S Staining)

1-10: Control  
11-20: Stress  
X: Blank  
M: Marker

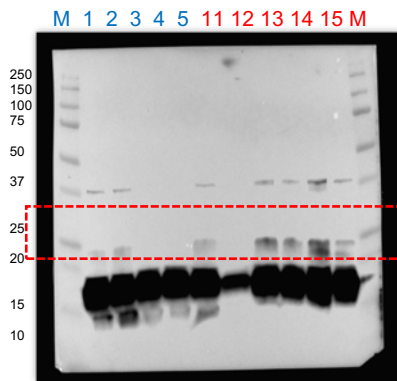

Blot 3

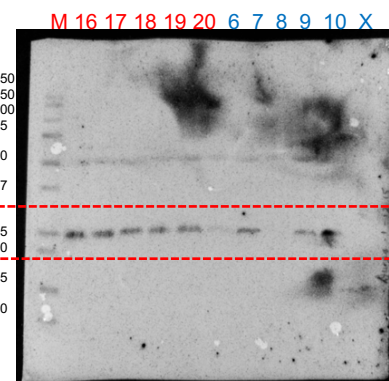

Blot 4

← BPIFA2

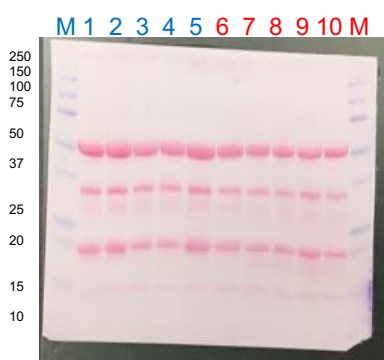

Blot 3 (Ponceau S Staining)

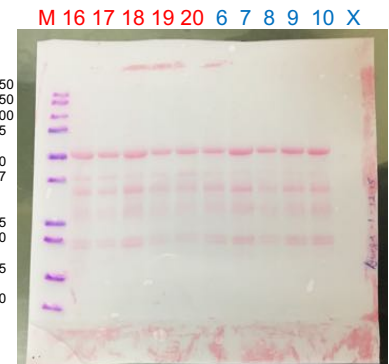

Blot 4 (Ponceau S Staining)
